# Supplementary material for: Transcriptional landscape of repetitive elements in normal and cancer human cells
Source: PubMed Central journal article supplement (PMC4122776; doi:10.1186/1471-2164-15-583), 2014-07-11
Supplement: 12864_2014_6313_MOESM1_ESM.pdf [file 12864_2014_6313_MOESM1_ESM.pdf]

**A**

| Repeat subfamily    | AluY     | AluJ     | L1H      | L1PA2    |
|---------------------|----------|----------|----------|----------|
| read1               | 1        | 0        | 0        | 0        |
| read2               | 1        | 1        | 0        | 0        |
| read3               | 0        | 0        | 1        | 1        |
| read4               | 0        | 0        | 0        | 1        |
| <b>Total counts</b> | <b>2</b> | <b>1</b> | <b>1</b> | <b>2</b> |

**B**

| Repeat subfamily     | AluY          | AluJ          | L1H           | L1PA2         |
|----------------------|---------------|---------------|---------------|---------------|
| read1                | 1             | 0             | 0             | 0             |
| read2                | $\frac{1}{2}$ | $\frac{1}{2}$ | 0             | 0             |
| read3                | 0             | 0             | $\frac{1}{2}$ | $\frac{1}{2}$ |
| read4                | 0             | 0             | 0             | 1             |
| <b>Unique counts</b> | <b>1</b>      | <b>0</b>      | <b>0</b>      | <b>1</b>      |

**C**

| Repeat subfamily         | AluY                            | AluJ                            | L1H                             | L1PA2                           |
|--------------------------|---------------------------------|---------------------------------|---------------------------------|---------------------------------|
| read1                    | 1                               | 0                               | 0                               | 0                               |
| read2                    | $\frac{1}{2}$                   | $\frac{1}{2}$                   | 0                               | 0                               |
| read3                    | 0                               | 0                               | $\frac{1}{2}$                   | $\frac{1}{2}$                   |
| read4                    | 0                               | 0                               | 0                               | 1                               |
| <b>Fractional counts</b> | <b><math>\frac{3}{2}</math></b> | <b><math>\frac{1}{2}</math></b> | <b><math>\frac{1}{2}</math></b> | <b><math>\frac{3}{2}</math></b> |

Figure S1
