# Supplementary material for: Transcriptional landscape of repetitive elements in normal and cancer human cells
Source: PubMed Central journal article supplement (PMC4122776; doi:10.1186/1471-2164-15-583), 2014-07-11
Supplement: 12864_2014_6313_MOESM2_ESM.pdf [file 12864_2014_6313_MOESM2_ESM.pdf]

| Emissions:<br>high = $\uparrow = 3.0 \pm 0.1$<br>low = $\downarrow = 0.5 \pm 0.1$                                                                                                                                                                                                                                                                                                                                                                                                                                                                                                                                             |                                                                                                                                          |                                                                                             |      |            |      |      |  |              |            |              |      |      |            |     |     |                                                                                                                                                                                                                                                                                                                                                                                                                                                                                                                                                                                                                                 |              |      |      |            |      |      |  |              |            |              |      |      |            |     |     |                                                                                                                                                                                                                                                                                                                                                                                                                                                                                                                                                                                                                                |              |      |      |            |      |      |  |              |            |              |      |      |            |     |     |
|-------------------------------------------------------------------------------------------------------------------------------------------------------------------------------------------------------------------------------------------------------------------------------------------------------------------------------------------------------------------------------------------------------------------------------------------------------------------------------------------------------------------------------------------------------------------------------------------------------------------------------|------------------------------------------------------------------------------------------------------------------------------------------|---------------------------------------------------------------------------------------------|------|------------|------|------|--|--------------|------------|--------------|------|------|------------|-----|-----|---------------------------------------------------------------------------------------------------------------------------------------------------------------------------------------------------------------------------------------------------------------------------------------------------------------------------------------------------------------------------------------------------------------------------------------------------------------------------------------------------------------------------------------------------------------------------------------------------------------------------------|--------------|------|------|------------|------|------|--|--------------|------------|--------------|------|------|------------|-----|-----|--------------------------------------------------------------------------------------------------------------------------------------------------------------------------------------------------------------------------------------------------------------------------------------------------------------------------------------------------------------------------------------------------------------------------------------------------------------------------------------------------------------------------------------------------------------------------------------------------------------------------------|--------------|------|------|------------|------|------|--|--------------|------------|--------------|------|------|------------|-----|-----|
| <p>L1 enriched sample 1 (n=3)</p> <hr/> <p>L1<math>\uparrow</math>:    <math>\downarrow</math>    <math>\uparrow</math></p> <table border="1" style="margin-left: 40px;"> <tr><td><math>\downarrow</math></td><td>0.50</td><td>0.50</td></tr> <tr><td><math>\uparrow</math></td><td>0.05</td><td>0.95</td></tr> </table> <p>else<math>\downarrow</math>:</p> <table style="margin-left: 40px;"> <tr><td></td><td><math>\downarrow</math></td><td><math>\uparrow</math></td></tr> <tr><td><math>\downarrow</math></td><td>0.95</td><td>0.05</td></tr> <tr><td><math>\uparrow</math></td><td>0.6</td><td>0.4</td></tr> </table> | $\downarrow$                                                                                                                             | 0.50                                                                                        | 0.50 | $\uparrow$ | 0.05 | 0.95 |  | $\downarrow$ | $\uparrow$ | $\downarrow$ | 0.95 | 0.05 | $\uparrow$ | 0.6 | 0.4 | <p>Alu enriched sample 2 (n=3)</p> <hr/> <p>Alu<math>\uparrow</math>:    <math>\downarrow</math>    <math>\uparrow</math></p> <table border="1" style="margin-left: 40px;"> <tr><td><math>\downarrow</math></td><td>0.50</td><td>0.50</td></tr> <tr><td><math>\uparrow</math></td><td>0.05</td><td>0.95</td></tr> </table> <p>else<math>\downarrow</math>:</p> <table style="margin-left: 40px;"> <tr><td></td><td><math>\downarrow</math></td><td><math>\uparrow</math></td></tr> <tr><td><math>\downarrow</math></td><td>0.95</td><td>0.05</td></tr> <tr><td><math>\uparrow</math></td><td>0.6</td><td>0.4</td></tr> </table> | $\downarrow$ | 0.50 | 0.50 | $\uparrow$ | 0.05 | 0.95 |  | $\downarrow$ | $\uparrow$ | $\downarrow$ | 0.95 | 0.05 | $\uparrow$ | 0.6 | 0.4 | <p>SVA enriched sample 3 (n=3)</p> <hr/> <p>L1<math>\uparrow</math>:    <math>\downarrow</math>    <math>\uparrow</math></p> <table border="1" style="margin-left: 40px;"> <tr><td><math>\downarrow</math></td><td>0.50</td><td>0.50</td></tr> <tr><td><math>\uparrow</math></td><td>0.05</td><td>0.95</td></tr> </table> <p>else<math>\downarrow</math>:</p> <table style="margin-left: 40px;"> <tr><td></td><td><math>\downarrow</math></td><td><math>\uparrow</math></td></tr> <tr><td><math>\downarrow</math></td><td>0.95</td><td>0.05</td></tr> <tr><td><math>\uparrow</math></td><td>0.6</td><td>0.4</td></tr> </table> | $\downarrow$ | 0.50 | 0.50 | $\uparrow$ | 0.05 | 0.95 |  | $\downarrow$ | $\uparrow$ | $\downarrow$ | 0.95 | 0.05 | $\uparrow$ | 0.6 | 0.4 |
| $\downarrow$                                                                                                                                                                                                                                                                                                                                                                                                                                                                                                                                                                                                                  | 0.50                                                                                                                                     | 0.50                                                                                        |      |            |      |      |  |              |            |              |      |      |            |     |     |                                                                                                                                                                                                                                                                                                                                                                                                                                                                                                                                                                                                                                 |              |      |      |            |      |      |  |              |            |              |      |      |            |     |     |                                                                                                                                                                                                                                                                                                                                                                                                                                                                                                                                                                                                                                |              |      |      |            |      |      |  |              |            |              |      |      |            |     |     |
| $\uparrow$                                                                                                                                                                                                                                                                                                                                                                                                                                                                                                                                                                                                                    | 0.05                                                                                                                                     | 0.95                                                                                        |      |            |      |      |  |              |            |              |      |      |            |     |     |                                                                                                                                                                                                                                                                                                                                                                                                                                                                                                                                                                                                                                 |              |      |      |            |      |      |  |              |            |              |      |      |            |     |     |                                                                                                                                                                                                                                                                                                                                                                                                                                                                                                                                                                                                                                |              |      |      |            |      |      |  |              |            |              |      |      |            |     |     |
|                                                                                                                                                                                                                                                                                                                                                                                                                                                                                                                                                                                                                               | $\downarrow$                                                                                                                             | $\uparrow$                                                                                  |      |            |      |      |  |              |            |              |      |      |            |     |     |                                                                                                                                                                                                                                                                                                                                                                                                                                                                                                                                                                                                                                 |              |      |      |            |      |      |  |              |            |              |      |      |            |     |     |                                                                                                                                                                                                                                                                                                                                                                                                                                                                                                                                                                                                                                |              |      |      |            |      |      |  |              |            |              |      |      |            |     |     |
| $\downarrow$                                                                                                                                                                                                                                                                                                                                                                                                                                                                                                                                                                                                                  | 0.95                                                                                                                                     | 0.05                                                                                        |      |            |      |      |  |              |            |              |      |      |            |     |     |                                                                                                                                                                                                                                                                                                                                                                                                                                                                                                                                                                                                                                 |              |      |      |            |      |      |  |              |            |              |      |      |            |     |     |                                                                                                                                                                                                                                                                                                                                                                                                                                                                                                                                                                                                                                |              |      |      |            |      |      |  |              |            |              |      |      |            |     |     |
| $\uparrow$                                                                                                                                                                                                                                                                                                                                                                                                                                                                                                                                                                                                                    | 0.6                                                                                                                                      | 0.4                                                                                         |      |            |      |      |  |              |            |              |      |      |            |     |     |                                                                                                                                                                                                                                                                                                                                                                                                                                                                                                                                                                                                                                 |              |      |      |            |      |      |  |              |            |              |      |      |            |     |     |                                                                                                                                                                                                                                                                                                                                                                                                                                                                                                                                                                                                                                |              |      |      |            |      |      |  |              |            |              |      |      |            |     |     |
| $\downarrow$                                                                                                                                                                                                                                                                                                                                                                                                                                                                                                                                                                                                                  | 0.50                                                                                                                                     | 0.50                                                                                        |      |            |      |      |  |              |            |              |      |      |            |     |     |                                                                                                                                                                                                                                                                                                                                                                                                                                                                                                                                                                                                                                 |              |      |      |            |      |      |  |              |            |              |      |      |            |     |     |                                                                                                                                                                                                                                                                                                                                                                                                                                                                                                                                                                                                                                |              |      |      |            |      |      |  |              |            |              |      |      |            |     |     |
| $\uparrow$                                                                                                                                                                                                                                                                                                                                                                                                                                                                                                                                                                                                                    | 0.05                                                                                                                                     | 0.95                                                                                        |      |            |      |      |  |              |            |              |      |      |            |     |     |                                                                                                                                                                                                                                                                                                                                                                                                                                                                                                                                                                                                                                 |              |      |      |            |      |      |  |              |            |              |      |      |            |     |     |                                                                                                                                                                                                                                                                                                                                                                                                                                                                                                                                                                                                                                |              |      |      |            |      |      |  |              |            |              |      |      |            |     |     |
|                                                                                                                                                                                                                                                                                                                                                                                                                                                                                                                                                                                                                               | $\downarrow$                                                                                                                             | $\uparrow$                                                                                  |      |            |      |      |  |              |            |              |      |      |            |     |     |                                                                                                                                                                                                                                                                                                                                                                                                                                                                                                                                                                                                                                 |              |      |      |            |      |      |  |              |            |              |      |      |            |     |     |                                                                                                                                                                                                                                                                                                                                                                                                                                                                                                                                                                                                                                |              |      |      |            |      |      |  |              |            |              |      |      |            |     |     |
| $\downarrow$                                                                                                                                                                                                                                                                                                                                                                                                                                                                                                                                                                                                                  | 0.95                                                                                                                                     | 0.05                                                                                        |      |            |      |      |  |              |            |              |      |      |            |     |     |                                                                                                                                                                                                                                                                                                                                                                                                                                                                                                                                                                                                                                 |              |      |      |            |      |      |  |              |            |              |      |      |            |     |     |                                                                                                                                                                                                                                                                                                                                                                                                                                                                                                                                                                                                                                |              |      |      |            |      |      |  |              |            |              |      |      |            |     |     |
| $\uparrow$                                                                                                                                                                                                                                                                                                                                                                                                                                                                                                                                                                                                                    | 0.6                                                                                                                                      | 0.4                                                                                         |      |            |      |      |  |              |            |              |      |      |            |     |     |                                                                                                                                                                                                                                                                                                                                                                                                                                                                                                                                                                                                                                 |              |      |      |            |      |      |  |              |            |              |      |      |            |     |     |                                                                                                                                                                                                                                                                                                                                                                                                                                                                                                                                                                                                                                |              |      |      |            |      |      |  |              |            |              |      |      |            |     |     |
| $\downarrow$                                                                                                                                                                                                                                                                                                                                                                                                                                                                                                                                                                                                                  | 0.50                                                                                                                                     | 0.50                                                                                        |      |            |      |      |  |              |            |              |      |      |            |     |     |                                                                                                                                                                                                                                                                                                                                                                                                                                                                                                                                                                                                                                 |              |      |      |            |      |      |  |              |            |              |      |      |            |     |     |                                                                                                                                                                                                                                                                                                                                                                                                                                                                                                                                                                                                                                |              |      |      |            |      |      |  |              |            |              |      |      |            |     |     |
| $\uparrow$                                                                                                                                                                                                                                                                                                                                                                                                                                                                                                                                                                                                                    | 0.05                                                                                                                                     | 0.95                                                                                        |      |            |      |      |  |              |            |              |      |      |            |     |     |                                                                                                                                                                                                                                                                                                                                                                                                                                                                                                                                                                                                                                 |              |      |      |            |      |      |  |              |            |              |      |      |            |     |     |                                                                                                                                                                                                                                                                                                                                                                                                                                                                                                                                                                                                                                |              |      |      |            |      |      |  |              |            |              |      |      |            |     |     |
|                                                                                                                                                                                                                                                                                                                                                                                                                                                                                                                                                                                                                               | $\downarrow$                                                                                                                             | $\uparrow$                                                                                  |      |            |      |      |  |              |            |              |      |      |            |     |     |                                                                                                                                                                                                                                                                                                                                                                                                                                                                                                                                                                                                                                 |              |      |      |            |      |      |  |              |            |              |      |      |            |     |     |                                                                                                                                                                                                                                                                                                                                                                                                                                                                                                                                                                                                                                |              |      |      |            |      |      |  |              |            |              |      |      |            |     |     |
| $\downarrow$                                                                                                                                                                                                                                                                                                                                                                                                                                                                                                                                                                                                                  | 0.95                                                                                                                                     | 0.05                                                                                        |      |            |      |      |  |              |            |              |      |      |            |     |     |                                                                                                                                                                                                                                                                                                                                                                                                                                                                                                                                                                                                                                 |              |      |      |            |      |      |  |              |            |              |      |      |            |     |     |                                                                                                                                                                                                                                                                                                                                                                                                                                                                                                                                                                                                                                |              |      |      |            |      |      |  |              |            |              |      |      |            |     |     |
| $\uparrow$                                                                                                                                                                                                                                                                                                                                                                                                                                                                                                                                                                                                                    | 0.6                                                                                                                                      | 0.4                                                                                         |      |            |      |      |  |              |            |              |      |      |            |     |     |                                                                                                                                                                                                                                                                                                                                                                                                                                                                                                                                                                                                                                 |              |      |      |            |      |      |  |              |            |              |      |      |            |     |     |                                                                                                                                                                                                                                                                                                                                                                                                                                                                                                                                                                                                                                |              |      |      |            |      |      |  |              |            |              |      |      |            |     |     |
| <p>Input sample 1 (n=3)</p> <hr/> <p>L1<math>\uparrow</math>:    <math>\downarrow</math>    <math>\uparrow</math></p> <table border="1" style="margin-left: 40px;"> <tr><td><math>\downarrow</math></td><td>0.95</td><td>0.05</td></tr> <tr><td><math>\uparrow</math></td><td>0.6</td><td>0.4</td></tr> </table> <p>else<math>\downarrow</math>:</p> <table style="margin-left: 40px;"> <tr><td></td><td><math>\downarrow</math></td><td><math>\uparrow</math></td></tr> <tr><td><math>\downarrow</math></td><td>0.95</td><td>0.05</td></tr> <tr><td><math>\uparrow</math></td><td>0.6</td><td>0.4</td></tr> </table>         | $\downarrow$                                                                                                                             | 0.95                                                                                        | 0.05 | $\uparrow$ | 0.6  | 0.4  |  | $\downarrow$ | $\uparrow$ | $\downarrow$ | 0.95 | 0.05 | $\uparrow$ | 0.6 | 0.4 | <p>Input sample 2 (n=3)</p> <hr/> <p>Alu<math>\uparrow</math>:    <math>\downarrow</math>    <math>\uparrow</math></p> <table border="1" style="margin-left: 40px;"> <tr><td><math>\downarrow</math></td><td>0.95</td><td>0.05</td></tr> <tr><td><math>\uparrow</math></td><td>0.6</td><td>0.4</td></tr> </table> <p>else<math>\downarrow</math>:</p> <table style="margin-left: 40px;"> <tr><td></td><td><math>\downarrow</math></td><td><math>\uparrow</math></td></tr> <tr><td><math>\downarrow</math></td><td>0.95</td><td>0.05</td></tr> <tr><td><math>\uparrow</math></td><td>0.6</td><td>0.4</td></tr> </table>          | $\downarrow$ | 0.95 | 0.05 | $\uparrow$ | 0.6  | 0.4  |  | $\downarrow$ | $\uparrow$ | $\downarrow$ | 0.95 | 0.05 | $\uparrow$ | 0.6 | 0.4 | <p>Input sample 3 (n=3)</p> <hr/> <p>L1<math>\uparrow</math>:    <math>\downarrow</math>    <math>\uparrow</math></p> <table border="1" style="margin-left: 40px;"> <tr><td><math>\downarrow</math></td><td>0.95</td><td>0.05</td></tr> <tr><td><math>\uparrow</math></td><td>0.6</td><td>0.4</td></tr> </table> <p>else<math>\downarrow</math>:</p> <table style="margin-left: 40px;"> <tr><td></td><td><math>\downarrow</math></td><td><math>\uparrow</math></td></tr> <tr><td><math>\downarrow</math></td><td>0.95</td><td>0.05</td></tr> <tr><td><math>\uparrow</math></td><td>0.6</td><td>0.4</td></tr> </table>          | $\downarrow$ | 0.95 | 0.05 | $\uparrow$ | 0.6  | 0.4  |  | $\downarrow$ | $\uparrow$ | $\downarrow$ | 0.95 | 0.05 | $\uparrow$ | 0.6 | 0.4 |
| $\downarrow$                                                                                                                                                                                                                                                                                                                                                                                                                                                                                                                                                                                                                  | 0.95                                                                                                                                     | 0.05                                                                                        |      |            |      |      |  |              |            |              |      |      |            |     |     |                                                                                                                                                                                                                                                                                                                                                                                                                                                                                                                                                                                                                                 |              |      |      |            |      |      |  |              |            |              |      |      |            |     |     |                                                                                                                                                                                                                                                                                                                                                                                                                                                                                                                                                                                                                                |              |      |      |            |      |      |  |              |            |              |      |      |            |     |     |
| $\uparrow$                                                                                                                                                                                                                                                                                                                                                                                                                                                                                                                                                                                                                    | 0.6                                                                                                                                      | 0.4                                                                                         |      |            |      |      |  |              |            |              |      |      |            |     |     |                                                                                                                                                                                                                                                                                                                                                                                                                                                                                                                                                                                                                                 |              |      |      |            |      |      |  |              |            |              |      |      |            |     |     |                                                                                                                                                                                                                                                                                                                                                                                                                                                                                                                                                                                                                                |              |      |      |            |      |      |  |              |            |              |      |      |            |     |     |
|                                                                                                                                                                                                                                                                                                                                                                                                                                                                                                                                                                                                                               | $\downarrow$                                                                                                                             | $\uparrow$                                                                                  |      |            |      |      |  |              |            |              |      |      |            |     |     |                                                                                                                                                                                                                                                                                                                                                                                                                                                                                                                                                                                                                                 |              |      |      |            |      |      |  |              |            |              |      |      |            |     |     |                                                                                                                                                                                                                                                                                                                                                                                                                                                                                                                                                                                                                                |              |      |      |            |      |      |  |              |            |              |      |      |            |     |     |
| $\downarrow$                                                                                                                                                                                                                                                                                                                                                                                                                                                                                                                                                                                                                  | 0.95                                                                                                                                     | 0.05                                                                                        |      |            |      |      |  |              |            |              |      |      |            |     |     |                                                                                                                                                                                                                                                                                                                                                                                                                                                                                                                                                                                                                                 |              |      |      |            |      |      |  |              |            |              |      |      |            |     |     |                                                                                                                                                                                                                                                                                                                                                                                                                                                                                                                                                                                                                                |              |      |      |            |      |      |  |              |            |              |      |      |            |     |     |
| $\uparrow$                                                                                                                                                                                                                                                                                                                                                                                                                                                                                                                                                                                                                    | 0.6                                                                                                                                      | 0.4                                                                                         |      |            |      |      |  |              |            |              |      |      |            |     |     |                                                                                                                                                                                                                                                                                                                                                                                                                                                                                                                                                                                                                                 |              |      |      |            |      |      |  |              |            |              |      |      |            |     |     |                                                                                                                                                                                                                                                                                                                                                                                                                                                                                                                                                                                                                                |              |      |      |            |      |      |  |              |            |              |      |      |            |     |     |
| $\downarrow$                                                                                                                                                                                                                                                                                                                                                                                                                                                                                                                                                                                                                  | 0.95                                                                                                                                     | 0.05                                                                                        |      |            |      |      |  |              |            |              |      |      |            |     |     |                                                                                                                                                                                                                                                                                                                                                                                                                                                                                                                                                                                                                                 |              |      |      |            |      |      |  |              |            |              |      |      |            |     |     |                                                                                                                                                                                                                                                                                                                                                                                                                                                                                                                                                                                                                                |              |      |      |            |      |      |  |              |            |              |      |      |            |     |     |
| $\uparrow$                                                                                                                                                                                                                                                                                                                                                                                                                                                                                                                                                                                                                    | 0.6                                                                                                                                      | 0.4                                                                                         |      |            |      |      |  |              |            |              |      |      |            |     |     |                                                                                                                                                                                                                                                                                                                                                                                                                                                                                                                                                                                                                                 |              |      |      |            |      |      |  |              |            |              |      |      |            |     |     |                                                                                                                                                                                                                                                                                                                                                                                                                                                                                                                                                                                                                                |              |      |      |            |      |      |  |              |            |              |      |      |            |     |     |
|                                                                                                                                                                                                                                                                                                                                                                                                                                                                                                                                                                                                                               | $\downarrow$                                                                                                                             | $\uparrow$                                                                                  |      |            |      |      |  |              |            |              |      |      |            |     |     |                                                                                                                                                                                                                                                                                                                                                                                                                                                                                                                                                                                                                                 |              |      |      |            |      |      |  |              |            |              |      |      |            |     |     |                                                                                                                                                                                                                                                                                                                                                                                                                                                                                                                                                                                                                                |              |      |      |            |      |      |  |              |            |              |      |      |            |     |     |
| $\downarrow$                                                                                                                                                                                                                                                                                                                                                                                                                                                                                                                                                                                                                  | 0.95                                                                                                                                     | 0.05                                                                                        |      |            |      |      |  |              |            |              |      |      |            |     |     |                                                                                                                                                                                                                                                                                                                                                                                                                                                                                                                                                                                                                                 |              |      |      |            |      |      |  |              |            |              |      |      |            |     |     |                                                                                                                                                                                                                                                                                                                                                                                                                                                                                                                                                                                                                                |              |      |      |            |      |      |  |              |            |              |      |      |            |     |     |
| $\uparrow$                                                                                                                                                                                                                                                                                                                                                                                                                                                                                                                                                                                                                    | 0.6                                                                                                                                      | 0.4                                                                                         |      |            |      |      |  |              |            |              |      |      |            |     |     |                                                                                                                                                                                                                                                                                                                                                                                                                                                                                                                                                                                                                                 |              |      |      |            |      |      |  |              |            |              |      |      |            |     |     |                                                                                                                                                                                                                                                                                                                                                                                                                                                                                                                                                                                                                                |              |      |      |            |      |      |  |              |            |              |      |      |            |     |     |
| $\downarrow$                                                                                                                                                                                                                                                                                                                                                                                                                                                                                                                                                                                                                  | 0.95                                                                                                                                     | 0.05                                                                                        |      |            |      |      |  |              |            |              |      |      |            |     |     |                                                                                                                                                                                                                                                                                                                                                                                                                                                                                                                                                                                                                                 |              |      |      |            |      |      |  |              |            |              |      |      |            |     |     |                                                                                                                                                                                                                                                                                                                                                                                                                                                                                                                                                                                                                                |              |      |      |            |      |      |  |              |            |              |      |      |            |     |     |
| $\uparrow$                                                                                                                                                                                                                                                                                                                                                                                                                                                                                                                                                                                                                    | 0.6                                                                                                                                      | 0.4                                                                                         |      |            |      |      |  |              |            |              |      |      |            |     |     |                                                                                                                                                                                                                                                                                                                                                                                                                                                                                                                                                                                                                                 |              |      |      |            |      |      |  |              |            |              |      |      |            |     |     |                                                                                                                                                                                                                                                                                                                                                                                                                                                                                                                                                                                                                                |              |      |      |            |      |      |  |              |            |              |      |      |            |     |     |
|                                                                                                                                                                                                                                                                                                                                                                                                                                                                                                                                                                                                                               | $\downarrow$                                                                                                                             | $\uparrow$                                                                                  |      |            |      |      |  |              |            |              |      |      |            |     |     |                                                                                                                                                                                                                                                                                                                                                                                                                                                                                                                                                                                                                                 |              |      |      |            |      |      |  |              |            |              |      |      |            |     |     |                                                                                                                                                                                                                                                                                                                                                                                                                                                                                                                                                                                                                                |              |      |      |            |      |      |  |              |            |              |      |      |            |     |     |
| $\downarrow$                                                                                                                                                                                                                                                                                                                                                                                                                                                                                                                                                                                                                  | 0.95                                                                                                                                     | 0.05                                                                                        |      |            |      |      |  |              |            |              |      |      |            |     |     |                                                                                                                                                                                                                                                                                                                                                                                                                                                                                                                                                                                                                                 |              |      |      |            |      |      |  |              |            |              |      |      |            |     |     |                                                                                                                                                                                                                                                                                                                                                                                                                                                                                                                                                                                                                                |              |      |      |            |      |      |  |              |            |              |      |      |            |     |     |
| $\uparrow$                                                                                                                                                                                                                                                                                                                                                                                                                                                                                                                                                                                                                    | 0.6                                                                                                                                      | 0.4                                                                                         |      |            |      |      |  |              |            |              |      |      |            |     |     |                                                                                                                                                                                                                                                                                                                                                                                                                                                                                                                                                                                                                                 |              |      |      |            |      |      |  |              |            |              |      |      |            |     |     |                                                                                                                                                                                                                                                                                                                                                                                                                                                                                                                                                                                                                                |              |      |      |            |      |      |  |              |            |              |      |      |            |     |     |
| <p>chr 5, <math>2 \times 10^6</math> reads<br/>chr 10, <math>2 \times 10^6</math> reads<br/>chr 19, <math>2 \times 10^7</math> reads</p>                                                                                                                                                                                                                                                                                                                                                                                                                                                                                      | <p>chr 5, <math>2 \times 10^6</math> reads<br/>chr 10, <math>2 \times 10^6</math> reads<br/>chr 19, <math>2 \times 10^7</math> reads</p> | <p>chr 5, <math>2 \times 10^6</math> reads<br/>chr 10, <math>2 \times 10^6</math> reads</p> |      |            |      |      |  |              |            |              |      |      |            |     |     |                                                                                                                                                                                                                                                                                                                                                                                                                                                                                                                                                                                                                                 |              |      |      |            |      |      |  |              |            |              |      |      |            |     |     |                                                                                                                                                                                                                                                                                                                                                                                                                                                                                                                                                                                                                                |              |      |      |            |      |      |  |              |            |              |      |      |            |     |     |

Figure S2
