# Supplementary material for: Transcriptional landscape of repetitive elements in normal and cancer human cells
Source: PubMed Central journal article supplement (PMC4122776; doi:10.1186/1471-2164-15-583), 2014-07-11
Supplement: 12864_2014_6313_MOESM7_ESM.pdf [file 12864_2014_6313_MOESM7_ESM.pdf]

A) **chromosome 5**  
**35 bp, Alu up/ input**

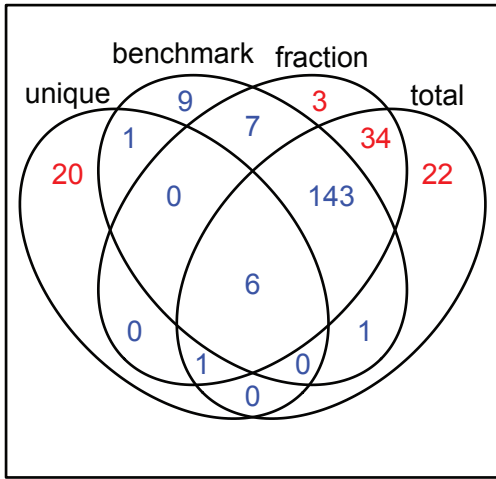

B) **chromosome 5**  
**50 bp, Alu up/ input**

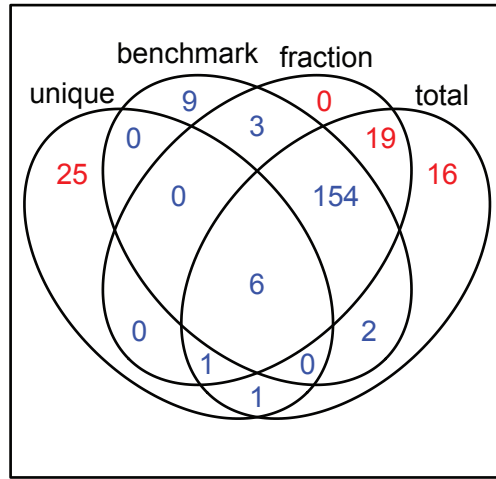

C) **chromosome 5**  
**75 bp, Alu up/ input**

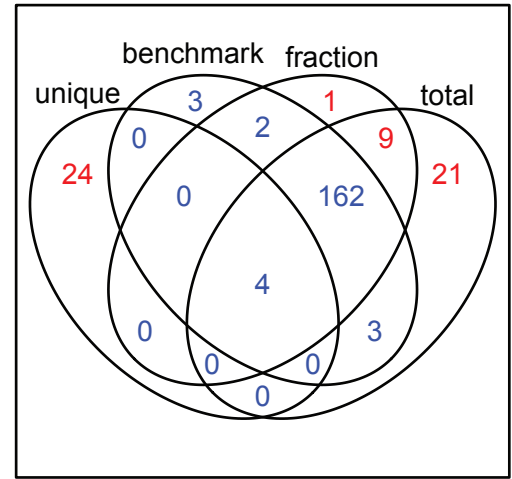

D) **chromosome 5**  
**35 bp, L1 up/ input**

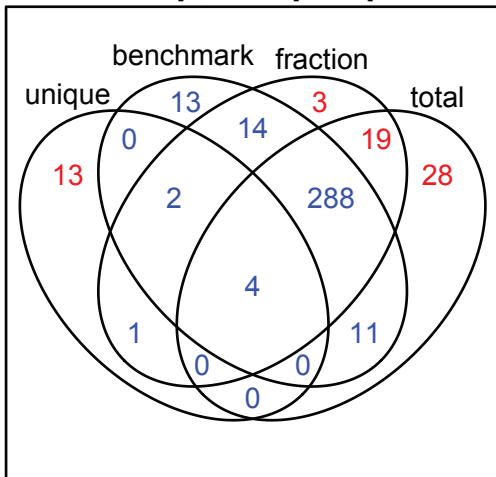

E) **chromosome 5**  
**50 bp, L1 up/ input**

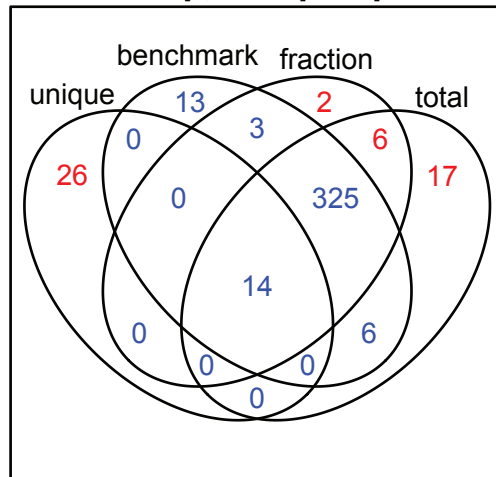

F) **chromosome 5**  
**75 bp, L1 up/ input**

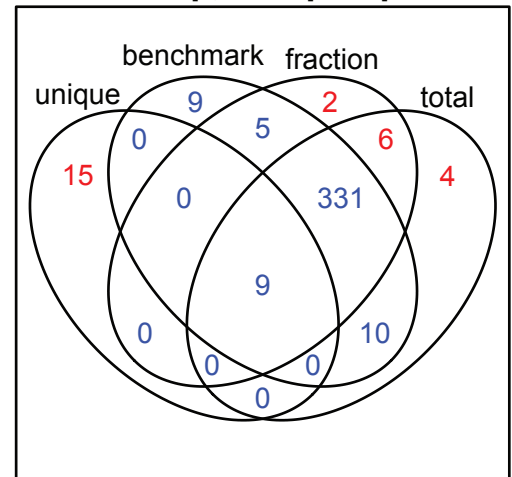

G) **chromosome 5**  
**35 bp, SVA up/ input**

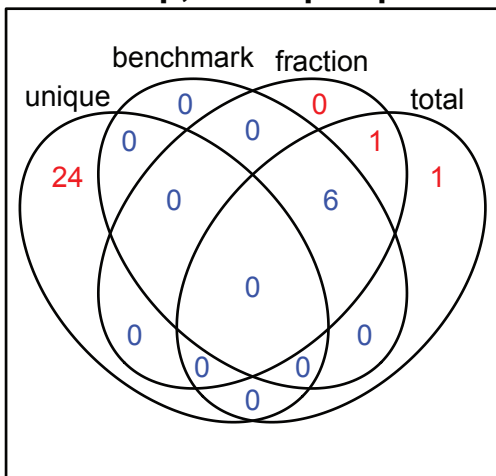

H) **chromosome 5**  
**50 bp, SVA up/ input**

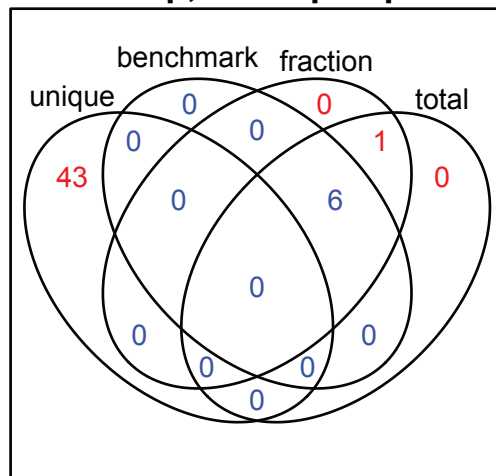

I) **chromosome 5**  
**75 bp, SVA up/ input**

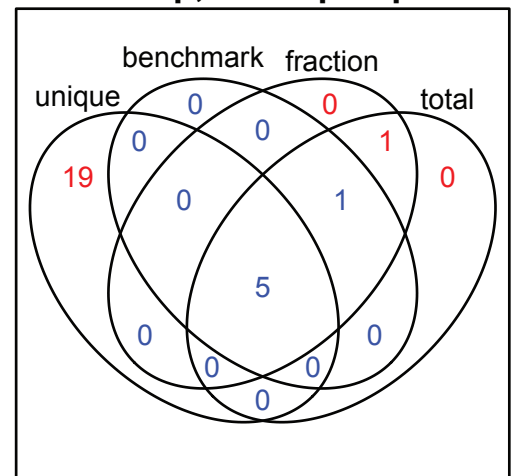

Figure S7
