# Supplementary material for: Transcriptional landscape of repetitive elements in normal and cancer human cells
Source: PubMed Central journal article supplement (PMC4122776; doi:10.1186/1471-2164-15-583), 2014-07-11
Supplement: 12864_2014_6313_MOESM14_ESM.pdf [file 12864_2014_6313_MOESM14_ESM.pdf]

LTR class elements  
FDR<0.05 in at least one Pol-II ChIP-seq

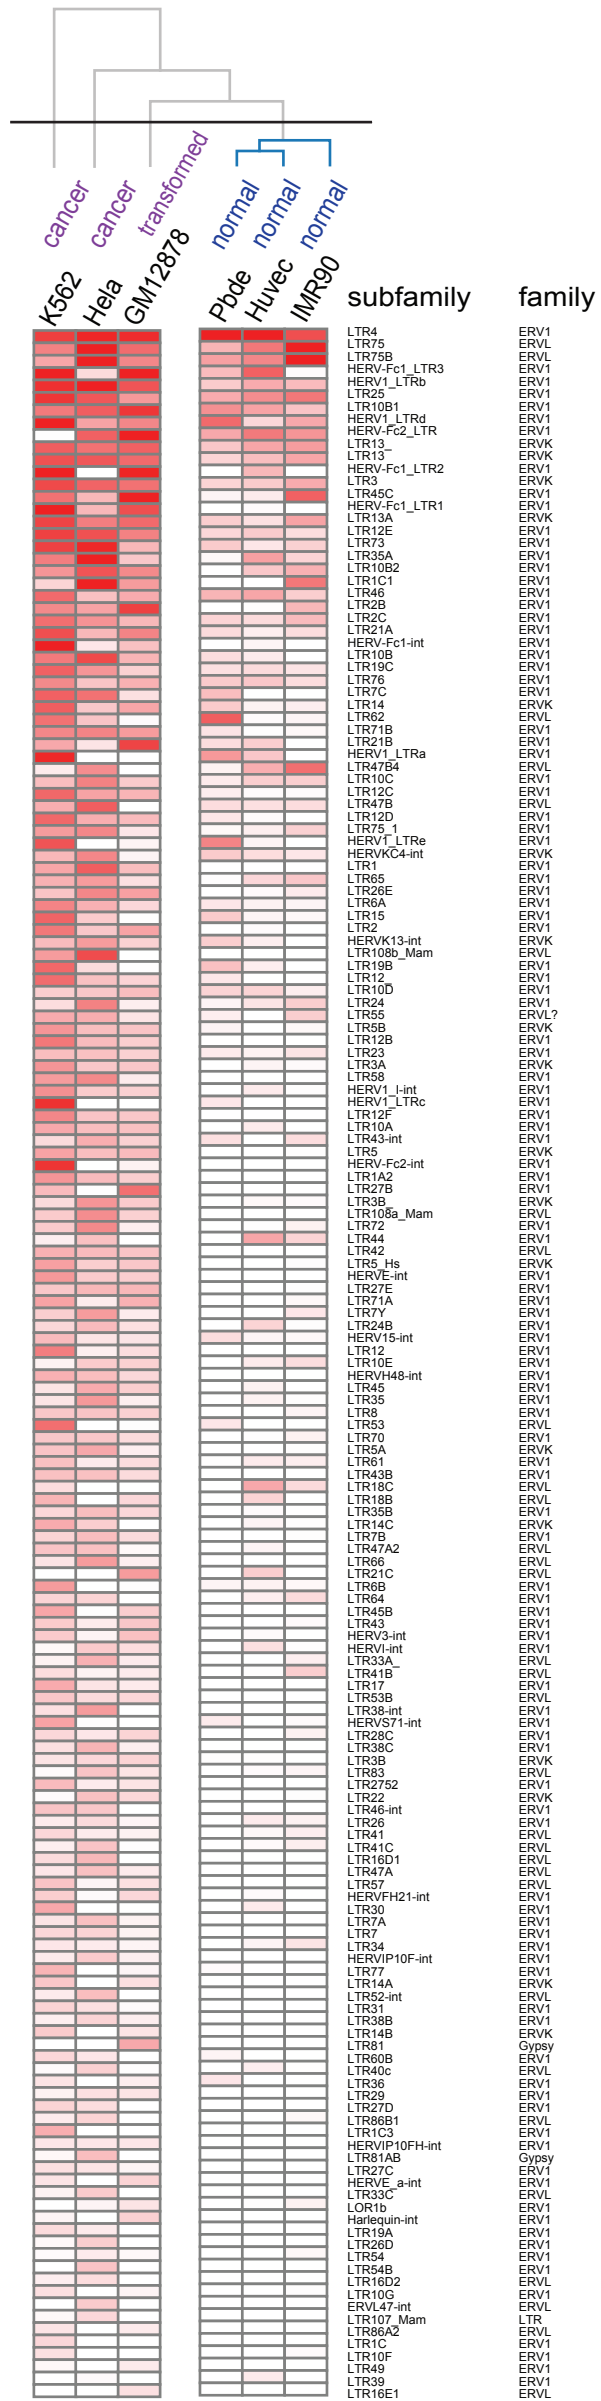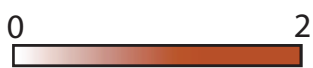

Log2FC

Figure S14
