# Supplementary material for: Transcriptional landscape of repetitive elements in normal and cancer human cells
Source: PubMed Central journal article supplement (PMC4122776; doi:10.1186/1471-2164-15-583), 2014-07-11
Supplement: 12864_2014_6313_MOESM15_ESM.pdf [file 12864_2014_6313_MOESM15_ESM.pdf]

Genic vs. intergenic L1PA and L1Hs unique

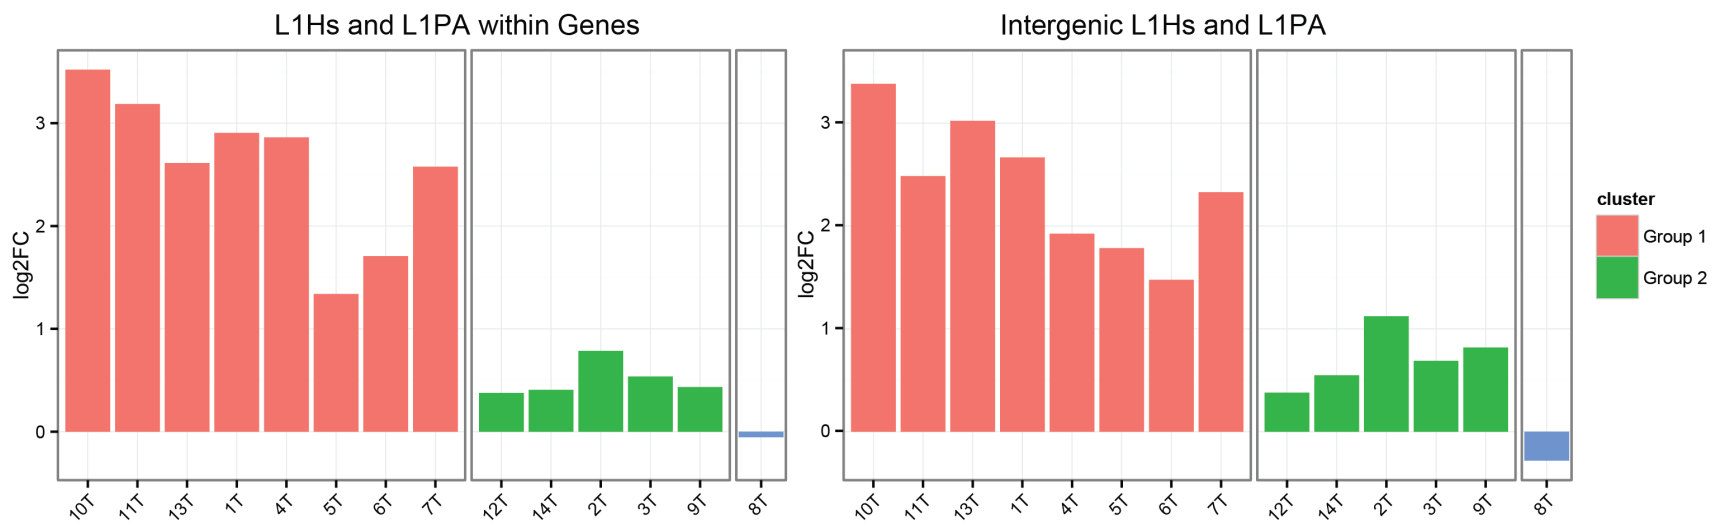

Figure S15
